# Supplementary material for: Protein language model-based prediction for plant miRNA encoded peptides
Source: PeerJ journal article supplement (doi:10.7717/peerj-cs.2733), 2025-03-18
Supplement: pLM4PEPmaster.zip [file Descriptors.pdf › pLM4PEP-master/pydpi/manual/Descriptors.pdf]

| <b>Molecular descriptors</b> |                                   |                            |
|------------------------------|-----------------------------------|----------------------------|
|                              | <b>Constitutional descriptors</b> |                            |
| 1 <sup>a</sup>               | Weight                            | Molecular weight           |
| 2                            | nhyd                              | Count of hydrogen atoms    |
| 3                            | nhal                              | Count of halogen atoms     |
| 4 <sup>a</sup>               | nhet                              | Count of hetero atoms      |
| 5 <sup>a</sup>               | nhev                              | Count of heavy atoms       |
| 6                            | ncof                              | Count of F atoms           |
| 7                            | ncocl                             | Count of Cl atoms          |
| 8                            | ncobr                             | Count of Br atoms          |
| 9                            | ncoi                              | Count of I atoms           |
| 10                           | ncarb                             | Count of C atoms           |
| 11                           | nphos                             | Count of P atoms           |
| 12                           | nsulph                            | Count of S atoms           |
| 13                           | noxy                              | Count of O atoms           |
| 14                           | nnitro                            | Count of N atoms           |
| 15 <sup>a</sup>              | nring                             | Number of rings            |
| 16 <sup>a</sup>              | nrot                              | Number of rotatable bonds  |
| 17 <sup>a</sup>              | ndonr                             | Number of H-bond donors    |
| 18 <sup>a</sup>              | naccr                             | Number of H-bond acceptors |
| 19                           | nsb                               | Number of single bonds     |

|                 |                                        |                                     |
|-----------------|----------------------------------------|-------------------------------------|
| 20              | ndb                                    | Number of double bonds              |
| 21              | ntb                                    | Number of triple bonds              |
| 22              | naro                                   | Number of aromatic bonds            |
| 23              | nta                                    | Number of all atoms                 |
| 24              | AWeight                                | Average molecular weight            |
| 25-30           | PC1<br>PC2<br>PC3<br>PC4<br>PC5<br>PC6 | Molecular path counts of length 1-6 |
|                 | <b>Topological descriptors</b>         |                                     |
| 1               | W                                      | Weiner index                        |
| 2               | AW                                     | Average Wiener index                |
| 3 <sup>a</sup>  | J                                      | Balaban's J index                   |
| 4               | T <sub>hara</sub>                      | Harary number                       |
| 5               | T <sub>sch</sub>                       | Schiultz index                      |
| 6               | Tigdi                                  | Graph distance index                |
| 7               | Platt                                  | Platt number                        |
| 8               | Xu                                     | Xu index                            |
| 9               | Pol                                    | Polarity number                     |
| 10              | Dz                                     | Pogliani index                      |
| 11 <sup>a</sup> | Ipc                                    | Ipc index                           |

|                   |                                                                                                                                                                        |                                                                  |
|-------------------|------------------------------------------------------------------------------------------------------------------------------------------------------------------------|------------------------------------------------------------------|
| 12 <sup>a</sup>   | BertzCT                                                                                                                                                                | BertzCT                                                          |
| 13                | GMTI                                                                                                                                                                   | Gutman molecular topological index based on simple vertex degree |
| 14-15             | ZM1<br>ZM2                                                                                                                                                             | Zagreb index with order 1-2                                      |
| 16-17             | MZM1<br>MZM2                                                                                                                                                           | Modified Zagreb index with order 1-2                             |
| 18                | Qindex                                                                                                                                                                 | Quadratic index                                                  |
| 19                | diametert                                                                                                                                                              | Largest value in the distance matrix                             |
| 20                | radiust                                                                                                                                                                | radius based on topology                                         |
| 21                | petitjeant                                                                                                                                                             | Petitjean based on topology                                      |
| 22                | Sito                                                                                                                                                                   | the logarithm of the simple topological index by Narumi          |
| 23                | Hato                                                                                                                                                                   | harmonic topological index proposed by Narumi                    |
| 24                | Geto                                                                                                                                                                   | Geometric topological index by Narumi                            |
| 25                | Arto                                                                                                                                                                   | Arithmetic topological index by Narumi                           |
|                   |                                                                                                                                                                        |                                                                  |
|                   | <b>Connectivity descriptors</b>                                                                                                                                        |                                                                  |
| 1-11 <sup>a</sup> | $\chi^v$<br>${}^1\chi^v$<br>${}^2\chi^v$<br>${}^3\chi_p^v$<br>${}^4\chi_p^v$<br>${}^5\chi_p^v$<br>${}^6\chi_p^v$<br>${}^7\chi_p^v$<br>${}^8\chi_p^v$<br>${}^9\chi_p^v$ | Valence molecular connectivity Chi index for path order 0-10     |

|                    |                                                                                                                                                     |                                                               |
|--------------------|-----------------------------------------------------------------------------------------------------------------------------------------------------|---------------------------------------------------------------|
|                    | $^{10}\chi_p^v$                                                                                                                                     |                                                               |
| 12                 | $^3\chi_c^v$                                                                                                                                        | Valence molecular connectivity Chi index for three cluster    |
| 13                 | $^4\chi_c^v$                                                                                                                                        | Valence molecular connectivity Chi index for four cluster     |
| 14                 | $^4\chi_{pc}^v$                                                                                                                                     | Valence molecular connectivity Chi index for path/cluster     |
| 15-18              | $^3\chi_{CH}^v$<br>$^4\chi_{CH}^v$<br>$^5\chi_{CH}^v$<br>$^6\chi_{CH}^v$                                                                            | Valence molecular connectivity Chi index for cycles of 3-6    |
| 19-29 <sup>a</sup> | $^0\chi$<br>$^1\chi$<br>$^2\chi$<br>$^3\chi_p$<br>$^4\chi_p$<br>$^5\chi_p$<br>$^6\chi_p$<br>$^7\chi_p$<br>$^8\chi_p$<br>$^9\chi_p$<br>$^{10}\chi_p$ | Simple molecular connectivity Chi indices for path order 0-10 |
| 30                 | $^3\chi_c$                                                                                                                                          | Simple molecular connectivity Chi indices for three cluster   |
| 31                 | $^4\chi_c$                                                                                                                                          | Simple molecular connectivity Chi indices for four cluster    |
| 32                 | $^4\chi_{pc}$                                                                                                                                       | Simple molecular connectivity Chi indices for path/cluster    |
| 33-36              | $^3\chi_{CH}$<br>$^4\chi_{CH}$<br>$^5\chi_{CH}$<br>$^6\chi_{CH}$                                                                                    | Simple molecular connectivity Chi indices for cycles of 3-6   |
| 37                 | mChi1                                                                                                                                               | mean chi1 (Randic) connectivity index                         |
| 38                 | knotp                                                                                                                                               | the difference between chi3c and chi4pc                       |

|                |                                      |                                                      |
|----------------|--------------------------------------|------------------------------------------------------|
| 39             | dchi0                                | the difference between chi0v and chi0                |
| 40             | dchi1                                | the difference between chi1v and chi1                |
| 41             | dchi2                                | the difference between chi2v and chi2                |
| 42             | dchi3                                | the difference between chi3v and chi3                |
| 43             | dchi4                                | the difference between chi4v and chi4                |
| 44             | knotpv                               | the difference between chiv3c and chiv4pc            |
|                | <b>Kappa descriptors</b>             |                                                      |
| 1              | $^1\kappa_\alpha$                    | Kappa alpha index for 1 bonded fragment              |
| 2              | $^2\kappa_\alpha$                    | Kappa alpha index for 2 bonded fragment              |
| 3              | $^3\kappa_\alpha$                    | Kappa alpha index for 3 bonded fragment              |
| 4              | phi                                  | Kier molecular flexibility index                     |
| 5 <sup>a</sup> | $^1\kappa$                           | Molecular shape Kappa index for 1 bonded fragment    |
| 6 <sup>a</sup> | $^2\kappa$                           | Molecular shape Kappa index for 2 bonded fragment    |
| 7 <sup>a</sup> | $^3\kappa$                           | Molecular shape Kappa index for 3 bonded fragment    |
|                | <b>Burden Descriptors</b>            |                                                      |
| 1-16           | bcutm1-16                            | Burden descriptors based on atomic mass              |
| 17-32          | bcutv1-16                            | Burden descriptors based on atomic volumes           |
| 33-48          | bcute1-16                            | Burden descriptors based on atomic electronegativity |
| 49-64          | bcutp1-16                            | Burden descriptors based on polarizability           |
|                | <b>Basak information descriptors</b> |                                                      |
| 1              | IC0                                  | Information content with order 0 proposed by Basak   |

|    |                            |                                                                     |
|----|----------------------------|---------------------------------------------------------------------|
| 2  | IC1                        | Information content with order 1 proposed by Basak                  |
| 3  | IC2                        | Information content with order 2 proposed by Basak                  |
| 4  | IC3                        | Information content with order 3 proposed by Basak                  |
| 5  | IC4                        | Information content with order 4 proposed by Basak                  |
| 6  | IC5                        | Information content with order 5 proposed by Basak                  |
| 7  | IC6                        | Information content with order 6 proposed by Basak                  |
| 8  | SIC0                       | Complementary information content with order 0<br>proposed by Basak |
| 9  | SIC1                       | Structural information content with order 1 proposed by Basak       |
| 10 | SIC2                       | Structural information content with order 2 proposed by Basak       |
| 11 | SIC3                       | Structural information content with order 3 proposed by Basak       |
| 12 | SIC4                       | Structural information content with order 4 proposed by Basak       |
| 13 | SIC5                       | Structural information content with order 5 proposed by Basak       |
| 14 | SIC6                       | Structural information content with order 6 proposed by Basak       |
| 15 | CIC0                       | Complementary information content with order 0<br>proposed by Basak |
| 16 | CIC1                       | Complementary information content with order 1 proposed by Basak    |
| 17 | CIC2                       | Complementary information content with order 2 proposed by Basak    |
| 18 | CIC3                       | Complementary information content with order 3 proposed by Basak    |
| 19 | CIC4                       | Complementary information content with order 4 proposed by Basak    |
| 20 | CIC5                       | Complementary information content with order 5 proposed by Basak    |
| 21 | CIC6                       | Complementary information content with order 6 proposed by Basak    |
|    | <b>E-state descriptors</b> |                                                                     |

|    |       |                                     |
|----|-------|-------------------------------------|
| 1  | S(1)  | Sum of E-State of atom type: sLi    |
| 2  | S(2)  | Sum of E-State of atom type: ssBe   |
| 3  | S(3)  | Sum of E-State of atom type: ssssBe |
| 4  | S(4)  | Sum of E-State of atom type: ssBH   |
| 5  | S(5)  | Sum of E-State of atom type: sssB   |
| 6  | S(6)  | Sum of E-State of atom type: ssssB  |
| 7  | S(7)  | Sum of E-State of atom type: sCH3   |
| 8  | S(8)  | Sum of E-State of atom type: dCH2   |
| 9  | S(9)  | Sum of E-State of atom type: ssCH2  |
| 10 | S(10) | Sum of E-State of atom type: tCH    |
| 11 | S(11) | Sum of E-State of atom type: dsCH   |
| 12 | S(12) | Sum of E-State of atom type: aaCH   |
| 13 | S(13) | Sum of E-State of atom type: sssCH  |
| 14 | S(14) | Sum of E-State of atom type: ddC    |
| 15 | S(15) | Sum of E-State of atom type: tsC    |
| 16 | S(16) | Sum of E-State of atom type: dssC   |
| 17 | S(17) | Sum of E-State of atom type: aasC   |
| 18 | S(18) | Sum of E-State of atom type: aaaC   |
| 19 | S(19) | Sum of E-State of atom type: ssssC  |
| 20 | S(20) | Sum of E-State of atom type: sNH3   |
| 21 | S(21) | Sum of E-State of atom type: sNH2   |

|    |       |                                     |
|----|-------|-------------------------------------|
| 22 | S(22) | Sum of E-State of atom type: ssNH2  |
| 23 | S(23) | Sum of E-State of atom type: dNH    |
| 24 | S(24) | Sum of E-State of atom type: ssNH   |
| 25 | S(25) | Sum of E-State of atom type: aaNH   |
| 26 | S(26) | Sum of E-State of atom type: tN     |
| 27 | S(27) | Sum of E-State of atom type: sssNH  |
| 28 | S(28) | Sum of E-State of atom type: dsN    |
| 29 | S(29) | Sum of E-State of atom type: aaN    |
| 30 | S(30) | Sum of E-State of atom type: sssN   |
| 31 | S(31) | Sum of E-State of atom type: ddsN   |
| 32 | S(32) | Sum of E-State of atom type: aasN   |
| 33 | S(33) | Sum of E-State of atom type: ssssN  |
| 34 | S(34) | Sum of E-State of atom type: sOH    |
| 35 | S(35) | Sum of E-State of atom type: dO     |
| 36 | S(36) | Sum of E-State of atom type: ssO    |
| 37 | S(37) | Sum of E-State of atom type: aaO    |
| 38 | S(38) | Sum of E-State of atom type: sF     |
| 39 | S(39) | Sum of E-State of atom type: sSiH3  |
| 40 | S(40) | Sum of E-State of atom type: ssSiH2 |
| 41 | S(41) | Sum of E-State of atom type: sssSiH |
| 42 | S(42) | Sum of E-State of atom type: ssssSi |



|    |       |                                      |
|----|-------|--------------------------------------|
| 43 | S(43) | Sum of E-State of atom type: sPH2    |
| 44 | S(44) | Sum of E-State of atom type: ssPH    |
| 45 | S(45) | Sum of E-State of atom type: sssP    |
| 46 | S(46) | Sum of E-State of atom type: dsssP   |
| 47 | S(47) | Sum of E-State of atom type: sssssP  |
| 48 | S(48) | Sum of E-State of atom type: sSH     |
| 49 | S(49) | Sum of E-State of atom type: dS      |
| 50 | S(50) | Sum of E-State of atom type: ssS     |
| 51 | S(51) | Sum of E-State of atom type: aaS     |
| 52 | S(52) | Sum of E-State of atom type: dssS    |
| 53 | S(53) | Sum of E-State of atom type: ddssS   |
| 54 | S(54) | Sum of E-State of atom type: sCl     |
| 55 | S(55) | Sum of E-State of atom type: sGeH3   |
| 56 | S(56) | Sum of E-State of atom type: ssGeH2  |
| 57 | S(57) | Sum of E-State of atom type: sssGeH  |
| 58 | S(58) | Sum of E-State of atom type: ssssGe  |
| 59 | S(59) | Sum of E-State of atom type: sAsH2   |
| 60 | S(60) | Sum of E-State of atom type: ssAsH   |
| 61 | S(61) | Sum of E-State of atom type: sssAs   |
| 62 | S(62) | Sum of E-State of atom type: sssdAs  |
| 63 | S(63) | Sum of E-State of atom type: sssssAs |

|         |                                    |                                                                               |
|---------|------------------------------------|-------------------------------------------------------------------------------|
| 64      | S(64)                              | Sum of E-State of atom type: sSeH                                             |
| 65      | S(65)                              | Sum of E-State of atom type: dSe                                              |
| 66      | S(66)                              | Sum of E-State of atom type: ssSe                                             |
| 67      | S(67)                              | Sum of E-State of atom type: aaSe                                             |
| 68      | S(68)                              | Sum of E-State of atom type: dssSe                                            |
| 69      | S(69)                              | Sum of E-State of atom type: ddssSe                                           |
| 70      | S(70)                              | Sum of E-State of atom type: sBr                                              |
| 71      | S(71)                              | Sum of E-State of atom type: sSnH3                                            |
| 72      | S(72)                              | Sum of E-State of atom type: ssSnH2                                           |
| 73      | S(73)                              | Sum of E-State of atom type: sssSnH                                           |
| 74      | S(74)                              | Sum of E-State of atom type: ssssSn                                           |
| 75      | S(75)                              | Sum of E-State of atom type: sI                                               |
| 76      | S(76)                              | Sum of E-State of atom type: sPbH3                                            |
| 77      | S(77)                              | Sum of E-State of atom type: ssPbH2                                           |
| 78      | S(78)                              | Sum of E-State of atom type: sssPbH                                           |
| 79      | S(79)                              | Sum of E-State of atom type: ssssPb                                           |
| 80-158  | Smax1-Smax79                       | maximum of E-State value of specified atom type                               |
| 159-237 | Smin1-Smin79                       | minimum of E-State value of specified atom type                               |
|         | <b>Autocorrelation descriptors</b> |                                                                               |
| 1-8     | ATSm1-ATSm8                        | Moreau-Broto autocorrelation descriptors based on atom mass                   |
| 9-16    | ATSv1-ATSV8                        | Moreau-Broto autocorrelation descriptors based on atomic van der Waals volume |

|                           |                                                      |                                                                                      |
|---------------------------|------------------------------------------------------|--------------------------------------------------------------------------------------|
| 17-24                     | ATSe1-ATSe8                                          | Moreau-Broto autocorrelation descriptors based on atomic Sanderson electronegativity |
| 25-32                     | ATSp1-ATSp8                                          | Moreau-Broto autocorrelation descriptors based on atomic polarizability              |
| 33-40                     | MATSm1-MATSm8                                        | Moran autocorrelation descriptors based on atom mass                                 |
| 41-48                     | MATSV1-MATSV8                                        | Moran autocorrelation descriptors based on atomic van der Waals volume               |
| 49-56                     | MATSe1-MATSe8                                        | Moran autocorrelation descriptors based on atomic Sanderson electronegativity        |
| 57-64                     | MATSp1-MATSp8                                        | Moran autocorrelation descriptors based on atomic polarizability                     |
| 65-72                     | GATSm1-GATSm8                                        | Geary autocorrelation descriptors based on atom mass                                 |
| 73-80                     | GATSV1-GATSV8                                        | Geary autocorrelation descriptors based on atomic van der Waals volume               |
| 81-88                     | GATSe1-GATSe8                                        | Geary autocorrelation descriptors based on atomic Sanderson electronegativity        |
| 89-96                     | GATSp1-GATSp8                                        | Geary autocorrelation descriptors based on atomic polarizability                     |
| <b>Charge descriptors</b> |                                                      |                                                                                      |
| 1-4                       | $Q_{Hmax}$<br>$Q_{Cmax}$<br>$Q_{Nmax}$<br>$Q_{Omax}$ | Most positive charge on H,C,N,O atoms                                                |
| 5-8                       | $Q_{Hmin}$<br>$Q_{Cmin}$<br>$Q_{Nmin}$<br>$Q_{Omin}$ | Most negative charge on H,C,N,O atoms                                                |
| 9-10                      | $Q_{max}$<br>$Q_{min}$                               | Most positive and negative charge in a molecule                                      |
| 11-15                     | $Q_{HSS}$<br>$Q_{CSS}$<br>$Q_{NSS}$<br>$Q_{OSS}$     | Sum of squares of charges on H,C,N,O and all toms                                    |

|                    |                                       |                                                                               |
|--------------------|---------------------------------------|-------------------------------------------------------------------------------|
|                    | Qass                                  |                                                                               |
| 16-17              | Mpc<br>Tpc                            | Mean and total of positive charges                                            |
| 18-19              | Mnc<br>Tnc                            | Mean and total of negative charges                                            |
| 20-21              | Mac<br>Tac                            | Mean and total of absolute charges                                            |
| 22                 | Rpc                                   | Relative positive charge                                                      |
| 23                 | Rnc                                   | Relative negative charge                                                      |
| 24                 | SPP                                   | Submolecular polarity parameter                                               |
| 25                 | LDI                                   | Local dipole index                                                            |
|                    | <b>Molecular property descriptors</b> |                                                                               |
| 1 <sup>a</sup>     | MREF                                  | Molar refractivity                                                            |
| 2 <sup>a</sup>     | logP                                  | LogP value based on the Crippen method                                        |
| 3                  | logP2                                 | Square of LogP value based on the Crippen method                              |
| 4 <sup>a</sup>     | TPSA                                  | Topological polarity surface area                                             |
| 5                  | UI                                    | Unsaturation index                                                            |
| 6                  | Hy                                    | Hydrophilic index                                                             |
|                    | <b>MOE-type descriptors</b>           |                                                                               |
| 1 <sup>a</sup>     | MTPSA                                 | topological polar surface area based on fragments                             |
| 2 <sup>a</sup>     | LabuteASA                             | Labute's Approximate Surface Area                                             |
| 3-14 <sup>a</sup>  | SLOGPVSA                              | MOE-type descriptors using SLogP contributions and surface area contributions |
| 15-24 <sup>a</sup> | SMRVSA                                | MOE-type descriptors using MR contributions and surface area contributions    |

|                                               |                 |                                                                                            |
|-----------------------------------------------|-----------------|--------------------------------------------------------------------------------------------|
| 25-38 <sup>a</sup>                            | PEOEVSA         | MOE-type descriptors using partial charges and surface area contributions                  |
| 39-49 <sup>a</sup>                            | EstateVSA       | MOE-type descriptors using Estate indices and surface area contributions                   |
| 50-60 <sup>a</sup>                            | VSAEstate       | MOE-type descriptors using surface area contributions and Estate indices                   |
| <b>Fragment/Fingerprint-based descriptors</b> |                 |                                                                                            |
| 1 <sup>a</sup>                                | FP2             | (Topological fingerprint) A Daylight-like fingerprint based on hashing molecular subgraphs |
| 2 <sup>a</sup>                                | MACCS           | (MACCS keys) Using the 166 public keys implemented as SMARTS                               |
| 3                                             | E-state         | 79 E-state fingerprints or fragments                                                       |
| 4                                             | FP4             | 307 FP4 fingerprints                                                                       |
| 5 <sup>a</sup>                                | Atom Paris      | Atom Paris fingerprints                                                                    |
| 6 <sup>a</sup>                                | Torsions        | Topological torsion fingerprints                                                           |
| 7 <sup>a</sup>                                | Morgan/Circular | Fingerprints based on the Morgan algorithm                                                 |

Note: <sup>a</sup> indicates that these descriptors are from RDkit. In PyDPI, we wrapped most of molecular descriptors from RDkit. The other descriptors are independently coded by us.
