# Supplementary material for: Protein language model-based prediction for plant miRNA encoded peptides
Source: PeerJ journal article supplement (doi:10.7717/peerj-cs.2733), 2025-03-18
Supplement: pLM4PEPmaster.zip [file Schneider-Wrede distance.xls]

## Sheet: Sheet1
	A	C	D	E	F	G	H	I	K	L	M	N	P	Q	R	S	T	V	W	Y
A	0	0.112	0.819	0.827	0.54	0.208	0.696	0.407	0.891	0.406	0.379	0.318	0.191	0.372	1	0.094	0.22	0.273	0.739	0.552
C	0.114	0	0.847	0.838	0.437	0.32	0.66	0.304	0.887	0.301	0.277	0.324	0.157	0.341	1	0.176	0.233	0.167	0.639	0.457
D	0.729	0.742	0	0.124	0.924	0.697	0.435	0.847	0.249	0.841	0.819	0.56	0.657	0.584	0.295	0.667	0.649	0.797	1	0.836
E	0.79	0.788	0.133	0	0.932	0.779	0.406	0.86	0.143	0.854	0.83	0.599	0.688	0.598	0.234	0.726	0.682	0.824	1	0.837
F	0.508	0.405	0.977	0.918	0	0.69	0.663	0.128	0.903	0.131	0.169	0.541	0.42	0.459	1	0.548	0.499	0.252	0.207	0.179
G	0.206	0.312	0.776	0.807	0.727	0	0.769	0.592	0.894	0.591	0.557	0.381	0.323	0.467	1	0.158	0.272	0.464	0.923	0.728
H	0.896	0.836	0.629	0.547	0.907	1	0	0.848	0.566	0.842	0.825	0.754	0.777	0.716	0.697	0.865	0.834	0.831	0.981	0.821
I	0.403	0.296	0.942	0.891	0.134	0.592	0.652	0	0.892	0.013	0.057	0.457	0.311	0.383	1	0.443	0.396	0.133	0.339	0.213
K	0.889	0.871	0.279	0.149	0.957	0.9	0.438	0.899	0	0.892	0.871	0.667	0.757	0.639	0.154	0.825	0.759	0.882	1	0.848
L	0.405	0.296	0.944	0.892	0.139	0.596	0.653	0.013	0.893	0	0.062	0.452	0.309	0.376	1	0.443	0.397	0.133	0.341	0.205
M	0.383	0.276	0.932	0.879	0.182	0.569	0.648	0.058	0.884	0.062	0	0.447	0.285	0.372	1	0.417	0.358	0.12	0.391	0.255
N	0.424	0.425	0.838	0.835	0.766	0.512	0.78	0.615	0.891	0.603	0.588	0	0.266	0.175	1	0.361	0.368	0.503	0.945	0.641
P	0.22	0.179	0.852	0.831	0.515	0.376	0.696	0.363	0.875	0.357	0.326	0.231	0	0.228	1	0.196	0.161	0.244	0.72	0.481
Q	0.512	0.462	0.903	0.861	0.671	0.648	0.765	0.532	0.881	0.518	0.505	0.181	0.272	0	1	0.461	0.389	0.464	0.831	0.522
R	0.919	0.905	0.305	0.225	0.977	0.928	0.498	0.929	0.141	0.92	0.908	0.69	0.796	0.668	0	0.86	0.808	0.914	1	0.859
S	0.1	0.185	0.801	0.812	0.622	0.17	0.718	0.478	0.883	0.474	0.44	0.289	0.181	0.358	1	0	0.174	0.342	0.827	0.615
T	0.251	0.261	0.83	0.812	0.604	0.312	0.737	0.455	0.866	0.453	0.403	0.315	0.159	0.322	1	0.185	0	0.345	0.816	0.596
V	0.275	0.165	0.9	0.867	0.269	0.471	0.649	0.135	0.889	0.134	0.12	0.38	0.212	0.339	1	0.322	0.305	0	0.472	0.31
W	0.658	0.56	1	0.931	0.196	0.829	0.678	0.305	0.892	0.304	0.344	0.631	0.555	0.538	0.968	0.689	0.638	0.418	0	0.204
Y	0.587	0.478	1	0.932	0.202	0.782	0.678	0.23	0.904	0.219	0.268	0.512	0.444	0.404	0.995	0.612	0.557	0.328	0.244	0
