# Supplementary material for: Protein language model-based prediction for plant miRNA encoded peptides
Source: PeerJ journal article supplement (doi:10.7717/peerj-cs.2733), 2025-03-18
Supplement: pLM4PEPmaster.zip [file UserGuide.pdf › pLM4PEP-master/pydpi/manual/UserGuide.pdf]

# User Guide for PyDPI 1.0

Dongsheng Cao

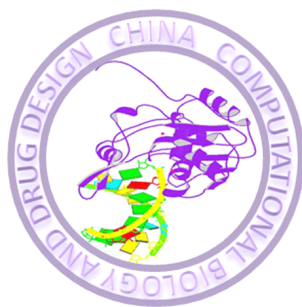

©2012 China Computational Biology Drug Design Group

## Table of Contents

|                                                           |    |
|-----------------------------------------------------------|----|
| 1. What is this?.....                                     | 3  |
| 2. Install the PyDPI package.....                         | 3  |
| 3. Working on drug molecules.....                         | 4  |
| 3.1. Read single molecules.....                           | 4  |
| 3.2. Download molecules from corresponding ID.....        | 5  |
| 3.3. Calculating molecular descriptors.....               | 6  |
| 3.4. Molecular fingerprints and chemoinformatics.....     | 9  |
| 3.4.1. Daylight-type fingerprints.....                    | 10 |
| 3.4.2. MACCS keys and FP4 fingerprints.....               | 10 |
| 3.4.3. E-state fingerprints.....                          | 11 |
| 3.4.4. Atom pairs and topological torsions.....           | 11 |
| 3.4.5. Morgan fingerprints.....                           | 11 |
| 3.4.6. Using PyDrug object.....                           | 11 |
| 3.4.7. Fingerprint similarity.....                        | 12 |
| 4. Working on protein sequences.....                      | 12 |
| 4.1. Download proteins from Uniprot.....                  | 12 |
| 4.2. Download the property from the AAindex database..... | 14 |
| 4.3. Calculating protein descriptors.....                 | 15 |
| 5. Interaction representation.....                        | 19 |
| 5.1 Protein-protein interaction descriptors.....          | 19 |
| 5.2. Protein-ligand interaction descriptors.....          | 19 |
| Appendix.....                                             | 21 |

## 1. What is this?

This document is intended to provide an overview of how one can use the PyDPI functionality from Python. It's not comprehensive and it's not a manual.

If you find mistakes, or have suggestions for improvements, please either fix them yourselves in the source document (the .py file) or send them to the mailing list: [oriental-cds@hotmail.com](mailto:oriental-cds@hotmail.com)

## 2. Install the PyDPI package

PyDPI has been successfully tested on Linux and Windows systems. The author could download this package from <https://sourceforge.net/projects/pydpicao/> (.zip and .tar.gz). The install process of PyDPI is very easy:

### On Windows:

- (1): download the pydpi package (.zip)
- (2): extract or uncompress the .zip file
- (3): cd pydpi-1.0
- (4): python setup.py install

### On Linux:

- (1): download the pydpi package (.tar.gz)
- (2): tar -zxf pydpi-1.0.tar.gz
- (3): cd pydpi-1.0
- (4): python setup.py install or sudo python setup.py install

Once the PyDPI package is installed, you can test if it is successfully installed.

```
>>> from pydpi import test|
>>> test.main()
Test successfully!
>>> from pydpi import example
>>> example.main()
```

If the above functions are all correctly run, the PyDPI package is successfully installed.

Note that you must guarantee that your computer is connected into the Internet.

### 3. Working on drug molecules

#### 3.1. Read single molecules

The majority of the basic drug molecular functionality is found in module pydrug:

```
>>> from pydpi import pydrug
```

Individual molecules can be constructed using a variety of approaches.

```
>>> from pydpi.pydrug import Chem
>>> mol=Chem.MolFromSmiles('O=C(Oc1ccccc1C(=O)O)C')
```

The PyDPI allow the users to provide different molecular formats.

```
>>> from pydpi import pydrug
>>> drug=pydrug.PyDrug()
>>> mol=drug.ReadMolFromSmile(smi='CC(Oc1ccccc1C(=O)O)=O')
>>> mol=drug.ReadMolFromInchi(inchi='InChI=1S/C9H8O4/c1-6(10)13-8-5-3-2-4-7(8)9(11)12/h2-5H,1H3,(H,11,12)')
>>> mol=drug.ReadMolFromMol("/home/orient/1.mol")
```

```
>>> from pydipi.pydrug import getmol
>>> mol=getmol.ReadMolFromSDF("/home/orient/drug.sdf")
>>> for i in mol:
...     print i
...
<rdkit.Chem.rdchem.Mol object at 0x5108ad0>
<rdkit.Chem.rdchem.Mol object at 0x5108a60>
<rdkit.Chem.rdchem.Mol object at 0x5108ad0>
<rdkit.Chem.rdchem.Mol object at 0x5108a60>
<rdkit.Chem.rdchem.Mol object at 0x5108ad0>
```

All of these functions return a Mol object on success:

```
>>> mol
<rdkit.Chem.rdchem.Mol object at 0x7f702c067360>
```

### 3.2. Download molecules from corresponding ID

The PyDPI allows the user to download the molecules by providing their IDs such as CAS, NCBI, KEGG, EBI and Drugbank.

```
>>> from pydipi.drug import getmol
>>> smi=getmol.GetMolFromCAS('50-78-2')
>>> print smi
CC(=O)Oc1ccccc1C(=O)[O-]
>>> smi=getmol.GetMolFromDrugbank('DB00945')
>>> print smi
CC(=O)Oc1ccccc1C(=O)O
>>> smi=getmol.GetMolFromKegg('D00109')
>>> print smi
CC(=O)Oc1ccccc1C(=O)O
>>> smi=getmol.GetMolFromNCBI(cid='2244')
>>> print smi
CC(=O)Oc1ccccc1C(=O)O
```

By providing a aspirin IDs, we could download its SMILES format conveniently.

We can also download a molecule by constructing a PyDrug object, which contains the majority of the basic drug molecular functionality.

```

>>> drug=pydrug.PyDrug()
>>> smi=drug.GetMolFromNCBI('2244')
>>> print smi
CC(OC1CCCCC1C(=O)O)=O
>>> mol=drug.ReadMolFromSmile(smi)

```

You could read a molecule by providing a Drugbank ID:

```

>>> drug=pydrug.PyDrug()
>>> smi=drug.GetMolFromDrugbank('DB00945')
>>> mol=drug.ReadMolFromSmile(smi)

```

### 3.3. Calculating molecular descriptors

The PyDPI package could calculate a large number of molecular descriptors including constitutional descriptors, topological descriptors, connectivity indices, E-state indices, autocorrelation descriptors, charge descriptors, molecular properties, kappa shape indices, MOE-type descriptors, and molecular fingerprints. These descriptors capture and magnify distinct aspects of chemical structures.

Once we read a Mol object, we could easily calculate these molecular descriptors:

#### Example 1: Calculating molecular constitutional descriptors

```

>>> from pydpi.drug import constitution
>>> res=constitution.CalculateMolWeight(mol)
>>> print res
172.095
>>> res=constitution.CalculatePath2(mol)
>>> print res
17
>>> res=constitution.CalculateRingNumber(mol)
>>> print res
1
>>> res=constitution.GetConstitutional(mol)
>>> print res
{'nphos': 0.0, 'ndb': 2.0, 'nsb': 5.0, 'ncoi': 0.0, 'ncarb': 9.0, 'nsulph': 4
4.0, 'nhet': 4.0, 'nhev': 13.0, 'nhal': 0.0, 'naccr': 3.0, 'nta': 21.0, 'ntb'
'PC1': 13.0, 'PC6': 19.0, 'PC4': 23.0, 'PC5': 24.0, 'AWeight': 13.238, 'ncocl

```

```

>>> from pydpi.pydrug import constitution, Chem
>>> molset=Chem.SDMolSupplier('/home/orient/drug.sdf')
>>> for mol in molset:
...     res=constitution.GetConstitutional(mol)
...     print len(res)
...
30
30
30
30
30

```

We could calculate any constitutional descriptor by calling the corresponding functions. We could also calculate all 30 descriptors by calling GetConstitutional function. The result is given in the form of dictionary.

### Example 2: Calculating topology descriptors

25 topology descriptors can be calculated by the PyDPI package. For detailed information of topology descriptors, refer to Table S2 in Appendix and their introductions in Manual.

```

>>> from pydpi.drug import topology
>>> res=topology.CalculateBalaban(mol)
>>> print res
2.46175836459
>>> res=topology.CalculateSchultz(mol)
>>> print res
981.0
>>> res=topology.GetTopology(mol)
>>> print res
{'W': 246.0, 'Geto': 1.831, 'DZ': 30.0, 'Arto': 2.0, 'radiust': 3.0, 'petitje
60.0, 'Thara': 33.783, 'Qindex': 7.0, 'Tsch': 981.0, 'J': 2.462, 'AW': 3.154,
3.04, 'Pol': 16.0, 'Hato': 1.66, 'Xu': 12.994}

```

### Example 3: Calculating molecular connectivity indices

```

>>> from pydpi.drug import connectivity
>>> from pydpi.pydrug import Chem
>>> mol=Chem.MolFromSmiles('CC(OC1CCCCC1C(=O)=O)=O')
>>> print connectivity.CalculateChi2(mol)
5.58195736265
>>> print connectivity.CalculateChi3c(mol)
1.04433105395
>>> res=connectivity.GetConnectivity(mol)
>>> print res
{'Chi3ch': 0.0, 'knotp': 0.609, 'dchi3': 2.227, 'dchi2': 3.187, 'dchi1':
'Chiv1': 3.617, 'Chiv0': 6.981, 'Chiv3': 1.371, 'Chiv2': 2.395, 'Chi4c':
'Chi8': 0.299, 'Chi9': 0.118, 'Chi2': 5.582, 'Chi3': 3.598, 'Chi0': 9.8
0.521, 'Chiv4c': 0.0, 'Chiv9': 0.01, 'Chi4pc': 1.653, 'knotpv': 0.132, '
'Chi4ch': 0.0, 'Chiv4ch': 0.0, 'mChi1': 0.47, 'Chi6ch': 0.083}

```

#### Example 4: Calculating molecular properties

```

>>> from pydpi.drug import molproperty
>>> from pydpi.pydrug import Chem
>>> mol=Chem.MolFromSmiles('CC(OC1CCCCC1C(=O)=O)=O')
>>> print molproperty.CalculateMolLogP(mol)
1.31
>>> print molproperty.CalculateTPSA(mol)
63.6
>>> print molproperty.CalculateMolMR(mol)
44.71
>>> print molproperty.GetMolecularProperty(mol)
{'TPSA': 63.6, 'Hy': -2.562, 'LogP': 1.31, 'LogP2': 1.716, 'UI': 3.17, 'MR': 44.71}

```

#### Example 5: Calculating Kappa shape descriptors

```

>>> from pydpi.drug import kappa
>>> from pydpi.pydrug import Chem
>>> mol=Chem.MolFromSmiles('CC(OC1CCCCC1C(=O)=O)=O')
>>> print kappa.CalculateKappa1(mol)
11.077
>>> print kappa.CalculateFlexibility(mol)
2.63909615385
>>> print kappa.CalculateKappaAlpha2(mol)
3.709
>>> res=kappa.GetKappa(mol)
>>> print res
{'phi': 2.639096153846154, 'kappa1': 11.077, 'kappa3': 3.324, 'kappa2': 5.024,

```

### Example 6: Calculating charge descriptors

```
>>> from pydpi.drug import charge
>>> from pydpi.pydrug import Chem
>>> mol=Chem.MolFromSmiles('CC(=O)C1CCCCC1C(=O)O')
>>> print charge.CalculateNSumSquareCharge(mol)
0
>>> print charge.CalculateAllMaxPCharge(mol)
0.339
>>> print charge.CalculateLocalDipoleIndex(mol)
0.322
>>> res=charge.GetCharge(mol)
>>> print res
{'QNmin': 0, 'QOss': 0.534, 'Mpc': 0.122, 'QHss': 0.108, 'SPP':
'QOmax': -0.246, 'Tpc': 1.584, 'Qmax': 0.339, 'QOmin': -0.478, '
0.214, 'Qmin': -0.478, 'Tac': 3.167, 'Mnc': -0.198}
```

### Example 7: Calculating descriptors using PyDrug object

An easier way to calculate molecular descriptors is to generate a PyDrug object and then call their methods. The PyDrug contains the majority of drug molecule operation functionality.

```
>>> from pydpi.pydrug import PyDrug
>>> drug=PyDrug() #construct a PyDrug object
>>> drug.ReadMolFromSmile('CC(=O)C1CCCCC1C(=O)O')
<rdkit.Chem.rdchem.Mol object at 0x3ef9de0>
>>> res1=drug.GetConnectivity()
>>> print len(res1)
44
>>> res2=drug.GetMOE()
>>> print len(res2)
60
>>> res3=drug.GetAllDescriptor() #calculate all descriptors
>>> print len(res3)
615
```

## 3.4. Molecular fingerprints and chemoinformatics

In the PyDPI package, there are seven types of molecular fingerprints which are defined by abstracting and magnifying different aspects of molecular topology.

### 3.4.1. Daylight-type fingerprints

```
>>> from pydpi.drug import fingerprint
>>> from pydpi.pydrug import Chem
>>> mol=Chem.MolFromSmiles('CC(=O)CCCCC1C(=O)O')
>>> res=fingerprint.CalculateDaylightFingerprint(mol)
>>> print res[0] #the number of fingerprints
2048
>>> print len(res[1]) #the number of bit 1
335
```

We can calculate the similarity between two molecules by specifying a type of similarity measure. There exist to be nine types of similarity measures to calculate the similarity between two molecules.

```
>>> print pydrug.fingerprint.similaritymeasure
['Tanimoto', 'Dice', 'Cosine', 'Sokal', 'Russel', 'Kulczynski', 'McConnaughey', 'Asymmetric', 'BraunBlanquet']
```

```
>>> from pydpi.drug import fingerprint
>>> from pydpi.pydrug import Chem
>>> ms=[Chem.MolFromSmiles(i) for i in ['CC(=O)CCCCC1C(=O)O', 'CCCOC=O']]
>>> fps=[fingerprint.CalculateDaylightFingerprint(i) for i in ms]
>>> print fingerprint.CalculateSimilarity(fps[0][2],fps[1][2], 'Tanimoto')
0.297
```

### 3.4.2. MACCS keys and FP4 fingerprints

```
>>> from pydpi.drug import fingerprint
>>> from pydpi.pydrug import Chem
>>> mol=Chem.MolFromSmiles('CC(=O)CCCCC1C(=O)O')
>>> res1=fingerprint.CalculateMACCSFingerprint(mol)
>>> print res1[0]
166
>>> res2=fingerprint.CalculateFP4Fingerprint('CC(=O)CCCCC1C(=O)O')
>>> print res2[0]
307
```

Note that the input of MACCS and FP4 is different.

### 3.4.3. E-state fingerprints

```
>>> from pydpi.drug import fingerprint
>>> from pydpi.pydrug import Chem
>>> mol=Chem.MolFromSmiles('CC(=O)C1CCCCC1C(=O)O')
>>> fp=fingerprint.CalculateEstateFingerprint(mol)
>>> print fp[0]
79
>>> print fp[1]
{'12': 1, '17': 1, '16': 1, '36': 1, '35': 1, '34': 1, '7': 1}
```

### 3.4.4. Atom pairs and topological torsions

```
>>> from pydpi.drug import fingerprint
>>> from pydpi.pydrug import Chem
>>> mol=Chem.MolFromSmiles('CC(=O)C1CCCCC1C(=O)O')
>>> fp1=fingerprint.CalculateAtomPairsFingerprint(mol)
>>> fp2=fingerprint.CalculateTopologicalTorsionFingerprint(mol)
>>> print fp1[0], fp2[0]
8388608 68719476735
>>> print len(fp1[1]), len(fp2[1])
51 16
```

### 3.4.5. Morgan fingerprints

```
>>> from pydpi.drug import fingerprint
>>> from pydpi.drug import getmol
>>> from pydpi.pydrug import Chem
>>> smi=getmol.GetMolFromNCBI('2244')
>>> mol=Chem.MolFromSmiles(smi)
>>> fp=fingerprint.CalculateMorganFingerprint(mol)
>>> print fp[0]
4294967295
>>> print len(fp[1])
25
```

### 3.4.6. Using PyDrug object

The convenient way to calculate the fingerprints is to generate a PyDrug object and call GetFingerprint method.

```

>>> from pydpi.pydrug import PyDrug
>>> drug=PyDrug() #generate a PyDrug object
>>> drug.ReadMolFromSmile('CC(=O)CCCCC1C(=O)O')
<rdkit.Chem.rdchem.Mol object at 0x3ef9de0>
>>> from pydpi import pydrug
>>> pydrug.FingerprintName
['topological', 'Estate', 'FP4', 'atompairs', 'torsions', 'morgan', 'MACCS']
>>> FP1=drug.GetFingerprint('Estate')
>>> FP2=drug.GetFingerprint('MACCS')
>>> FP3=drug.GetFingerprint('topological')
>>> print FP1[0], FP2[0],FP3[0]
79 166 2048

```

### 3.4.7. Fingerprint similarity

We could any fingerprint similarity using the nine given similarity measure methods.

```

>>> print pydrug.FingerprintName
['topological', 'Estate', 'FP4', 'atompairs', 'torsions', 'morgan', 'MACCS']
>>> print pydrug.fingerprint.similaritymeasure
['Tanimoto', 'Dice', 'Cosine', 'Sokal', 'Russel', 'Kulczynski', 'McConnaughey', 'Asymmetric', 'BraunBlanquet']
>>> drug1=pydrug.PyDrug()
>>> drug1.ReadMolFromSmile('CC(=O)CCCCC1C(=O)O')
<rdkit.Chem.rdchem.Mol object at 0x7f70440982f0>
>>> fp1=drug1.GetFingerprint(FPName='topological')
>>> drug2=pydrug.PyDrug()
>>> drug2.ReadMolFromSmile(smi='CCCC=O')
<rdkit.Chem.rdchem.Mol object at 0x3fd1130>
>>> drug2.GetFingerprint(FPName='topological')
(2048, {1: 1, 34: 1, 50: 1, 36: 1, 6: 1, 7: 1, 8: 1, 42: 1, 45: 1, 13: 1, 14: 1, 15: 1, 18: 1, 20: 1, 46: 1, 2:
>>> fp2=drug2.GetFingerprint(FPName='topological')
>>> print pydrug.fingerprint.CalculateSimilarity(fp1[2], fp2[2], similarity='Tanimoto')

```

## 4. Working on protein sequences

### 4.1. Download proteins from Uniprot

```
>>> from pydpi import pypro
>>> ps=pypro.GetProteinSequence('P48039')
>>> print ps
MQGNGSALPNASQPVLRGD GARPSWLASALACVLIFTIVVDILGNLLVILSVYRNKKLRNAGNIFVVS LAVADLVVAIYPYPLVLM SIFNNGWN LGY
LHCQVSGFLMGLSVIGSIFNITGIAINRYCYICHSLKYDKLYSSKNSLCYVLLIWLLTLAAVLPNLRAGTLQYDPRIYSCTFAQSVSSAYTIAVVVF
HFLVPMIIVIFCYLRIWILVLQVRQVRVKPDRKPKLPQDFRNFVTMFVVFVLF AICWAPLNFIGLAVASDPASMVPRIPEWLFVASYYMAYFNSCLN
AIIYGLLNQNRKEYRRIIVSLCTARVFFVDSSNDVADR VKWKPSPLMTNNNVVKVDSV
```

You can get a protein sequence from the Uniprot website by providing a Uniprot ID.

You can get the window $\times 2+1$  sub-sequences whose central point is the given amino acid ToAA.

```
>>> subseq=pypro.GetSubSequence(ps,ToAA='S',window=5)
>>> print subseq
['MQGNGSALPNA', 'ALPNASQPVL', 'D GARPSWLASA', 'PSWLASALACV', 'LLVILSVYRNK', 'NIFVVS LAVAD',
'PLVLM SIFNNG', 'LHCQVSGFLMG', 'FLMGLSVIGSI', 'LSVIGSIFNIT', 'CYICHSLKYDK', 'YDKLYSSKNSL',
'DKLYSSKNSLC', 'YSSKNSLCYVL', 'DPRIYSCTFAQ', 'CTFAQSVSSAY', 'FAQSVSSAYTI', 'AQSVSSAYTIA',
'GLAVASDPASM', 'ASDPASMVPRI', 'WLFVASYYMAY', 'MAYFNSCLNAI', 'RRIIVSLCTAR', 'VFFVDSSNDVA',
'FFVDSSNDVAD', 'VKWKPSPLMTN']
```

You can also get several protein sequences by providing a file containing Uniprot IDs of these proteins.

```
>>> from pydpi.protein import GetProteinFromUniprot
>>> tag=GetProteinFromUniprot.GetProteinSequenceFromTxt('/home/orient/', 'target.txt', 'res.txt')
-----
The 1 protein sequence has been downloaded!
MADSCRNLTYVRGSGVPATSTLMFVAGVVGNGLALGILSARRPARPSAFVAVLTGLAATDLLGTSFLSPA V FVAYARNSSLLGLARGGPALCDAFAFAI
HQQYCPGSWCFLMRWAQPGGA AFSLAYAGLVALLVAAIFLCNGSVTLSLCRMYRQQRKHQGS LGPRPRTGEDEV D HILLALMTVVMVAVCSLPLTIRI
TPLSQLASGRDRPRAPSAPVGKEGSCVPLSAWGEGQVEPLPPTQQSSGSAVGTSSKAEASVACSLC
-----
The 2 protein sequence has been downloaded!
MPNNSTALSLANVTYITMEIFIGLCAIVGNVLVICVVKLNPSLQTTTFYFIVSLALADIAVGVLV MPLAIVVSLGITIHFYSCLFMTCLLLIFTHASII
VTFLSCQFVSVMRMDYMVYFSFLTWIFIPLVVMCIYLDIFYIIRNKLSLNSNSKETGAFYGREFKTAKSLFLVLFLFALSWLPLSIINCIIFYNGE'
-----
The 3 protein sequence has been downloaded!
MQGNGSALPNASQPVLRGD GARPSWLASALACVLIFTIVVDILGNLLVILSVYRNKKLRNAGNIFVVS LAVADLVVAIYPYPLVLM SIFNNGWN LGYLI
PNLRAGTLQYDPRIYSCTFAQSVSSAYTIAVVVFHFLVPMIIVIFCYLRIWILVLQVRQVRVKPDRKPKLPQDFRNFVTMFVVFVLF AICWAPLNFIGI
VDSSNDVADR VKWKPSPLMTNNNVVKVDSV
-----
```

The downloaded protein sequences have been saved in "/home/orient/res.txt".

The user can also download the pdb file by providing corresponding pdb id, and then extract its amino acid sequence.

```
>>> from pydipi.protein import getpdb
>>> getpdb.GetPDB(['1atp'])
Connecting...
1atp.pdb retrieved successfully.
True
>>> seq=getpdb.GetSeqFromPDB("/home/orient/1atp.pdb")
>>> print seq
GNAAAAKKGSEQESVKEFLAKAKEDFLKKWETPSQNTAQLDQFDRIKTLGTGSFGRVMLVKHKESGNHYAMKILDKQKVVLKQI
DLIYRDLKPENLLIDQGYIQVTDGFGAKRVKGRTWXLCGTPEYLAPEIILSKGYNKAVDWWALGVLIYEMAAGYPPFFADQPIQ
PGDTSNFDDYEEEEIRVXINEKCGKEFTEFTTYADFIASGRTGRRNAIHD
```

The downloaded protein has been saved in “/home/orient/1atp.pdb”.

You could check whether the input sequence is a valid protein sequence or not.

```
>>> temp=pypro.ProteinCheck(ps)
>>> print temp
350
```

The output is the number of the protein sequence if it is valid; otherwise 0.

## 4.2. Download the property from the AAindex database

You could get the properties of amino acids from the AAindex database by providing a property name (e.g., KRIW790103). The output is given in the form of dictionary.

If the user provides the directory containing the AAindex database (the AAindex database could be downloaded from <ftp://ftp.genome.jp/pub/db/community/aaindex/>. It consists of three files: aaindex1, aaindex2 and aaindex3), the program will read the given database to get the property.

```
>>> from pydpi.pypro import GetAAIndex1, GetAAIndex23
>>> proindex=GetAAIndex1('KRIW790103',path='.')
>>> print proindex
{'A': 27.5, 'C': 44.6, 'E': 62.0, 'D': 40.0, 'G': 0.0, 'F': 115.5, 'I': 93.5, 'H': 79.0, 'K': 100.0, 'M': 94.1, 'L': 93.5, 'N': 58.7, 'Q': 80.7, 'P': 41.9, 'S': 29.3, 'R': 105.0, 'T': 51.3, 'W': 145.5, 'V': 71.5, 'Y': 117.3}
```

It should be noted that the PyDPI package has contained the AAindex database. The GetAAIndex1 methods in AAIndex will get the property from the aaindex1 database.

If the user does not provide the directory containing the AAindex database, the program will download the three databases (i.e., aaindex1, aaindex2 and aaindex3) to obtain the property. It should be noted that the downloaded AAindex will be saved in the current directory. You can also specify the directory according to your needs.

```
>>> proindex=GetAAIndex23('GRAR740104',path='/home/orient/')
>>> print len(proindex)
400
```

The downloaded databases are saved in F disk. The GetAAIndex23 methods in AAIndex will get the property from the aaindex2 and aaindex3 databases.

### 4.3. Calculating protein descriptors

There are two ways to calculate protein descriptors in the PyDPI package. One is to directly use the corresponding methods, the other one is firstly to construct a PyPro class and then run their methods to obtain the protein descriptors. It should be noted that the output is a dictionary form, whose keys and values represent the descriptor name and the descriptor value, respectively. The user could clearly understand the meaning of each descriptor.

#### Use functions:

```
>>> from pydpi.pypro import AAComposition
>>> print AAComposition.CalculateAAComposition(ps)
{'A': 7.714, 'C': 2.857, 'E': 0.571, 'D': 3.429, 'G': 4.286, 'F': 5.714,
 : 4.857, 'S': 7.714, 'R': 5.143, 'T': 2.571, 'W': 2.0, 'V': 11.714, 'Y':
>>> from pydpi.pypro import CTD
>>> ctd=CTD.CalculateCTD(ps)
>>> print ctd
{'_NormalizedVDWVD1075': 75.143, '_PolarityD1075': 71.714, '_SecondaryStr
0.149, '_PolarityD3025': 35.714, '_NormalizedVDWVC1': 0.306, '_Normalized
'_PolarityD1100': 100.0, '_NormalizedVDWVD2100': 100.0, '_Charged3050': 6
'_HydrophobicityD3050': 51.143, '_PolarityT12': 0.112, '_PolarityT13': 0.
: 0.286, '_ChargedD1075': 86.571, '_SecondaryStrD1075': 72.571, '_Polariza
74.857, '_HydrophobicityD3025': 25.143, '_PolarizabilityD3025': 33.143, '
```

We can also compute various types of descriptors based on PDB format.

```
>>> from pydpi.protein import getpdb, AAComposition
>>> getpdb.GetPDB(['latp'])
Connecting...
latp.pdb retrieved successfully.
True
>>> ps=getpdb.GetSeqFromPDB('/home/orient/latp.pdb')
>>> res=AAComposition.CalculateAAComposition(ps)
>>> print len(res)
20
```

### Use GetProDes class:

```
>>> from pydpi.pypro import PyPro
>>> print PyPro.AALetter
['A', 'R', 'N', 'D', 'C', 'E', 'Q', 'G', 'H', 'I', 'L', 'K', 'M', 'F', 'P', 'S', 'T', 'W', 'Y', 'V']
```

### Example 1: Calculating amino acid composition descriptors

```
>>> protein=PyPro()
>>> protein=PyPro() #generate a protein object
>>> protein.ReadProteinSequence(ps)
>>> print protein.GetAAComp()
{'A': 7.714, 'C': 2.857, 'E': 0.571, 'D': 3.429, 'G': 4.286, 'F': 5.714, 'I': 8.0,
 'H': 0.857, 'K': 3.714, 'M': 2.286, 'L': 12.286, 'N': 6.571, 'Q': 2.571, 'P':
4.857, 'S': 7.714, 'R': 5.143, 'T': 2.571, 'W': 2.0, 'V': 11.714, 'Y': 5.143}
```

### Example 2: Calculating Moran autocorrelation descriptors

```
>>> protein=PyPro() #generate a protein object
>>> protein.ReadProteinSequence(ps)
>>> moran=protein.GetMoranAuto()
>>> for i in moran:
...     print i, moran[i]
...
MoranAuto_ResidueVol8 0.059
MoranAuto_ResidueVol9 0.042
MoranAuto_ResidueVol4 0.128
MoranAuto_ResidueVol5 0.043
MoranAuto_ResidueVol6 -0.047
MoranAuto_ResidueVol7 0.019
MoranAuto_ResidueVol1 0.049
MoranAuto_ResidueVol2 0.034
```

### Example 3: Calculating pseudo amino acid composition descriptors

```
>>> protein=PyPro() #generate a protein object
>>> protein.ReadProteinSequence(ps)
>>> paac=protein.GetPAAC(lamda=5,weight=0.05)
>>> print paac
{'PAAC24': 5.613, 'PAAC25': 5.887, 'PAAC8': 3.043, 'PAAC9': 0.609, 'PAAC2': 3.652,
 'PAAC3': 4.666, 'PAAC1': 5.478, 'PAAC6': 0.405, 'PAAC7': 1.826, 'PAAC4': 2.435,
 'PAAC5': 2.029, 'PAAC21': 6.071, 'PAAC20': 8.318, 'PAAC23': 5.897, 'PAAC22': 5.521,
 'PAAC18': 1.42, 'PAAC19': 3.652, 'PAAC14': 4.058, 'PAAC15': 3.449, 'PAAC16':
 5.478, 'PAAC17': 1.826, 'PAAC10': 5.681, 'PAAC11': 8.724, 'PAAC12': 2.637,
 'PAAC13': 1.623}
```

When we change the values of lamda and weight, we could get different PAAC values. Note that the number of PAAC depends on the choice of lamda. If lamda = 10, we can obtain 20+lamda=30 PAAC descriptors.

```
>>> paac=protein.GetPAAC(lamda=10,weight=0.05)
>>> print paac
{'PAAC29': 4.548, 'PAAC24': 4.283, 'PAAC28': 4.787, 'PAAC25': 4.491, 'PAAC23': 4.5
, 'PAAC8': 2.322, 'PAAC9': 0.464, 'PAAC2': 2.786, 'PAAC3': 3.56, 'PAAC1': 4.179,
'PAAC6': 0.309, 'PAAC7': 1.393, 'PAAC4': 1.858, 'PAAC5': 1.548, 'PAAC21': 4.632,
'PAAC20': 6.346, 'PAAC30': 4.863, 'PAAC22': 4.212, 'PAAC18': 1.084, 'PAAC19':
2.786, 'PAAC27': 4.681, 'PAAC26': 4.825, 'PAAC14': 3.096, 'PAAC15': 2.631,
'PAAC16': 4.179, 'PAAC17': 1.393, 'PAAC10': 4.334, 'PAAC11': 6.656, 'PAAC12':
2.012, 'PAAC13': 1.239}
```

#### Example 4: Calculating all protein descriptors

The PyPro class includes a built-in method which can calculate all protein descriptors.

```
>>> allp=protein.GetALL()
>>> print len(allp)
2049
```

#### Example 5: Calculating protein descriptors based on the user-defined property

The user could provide some property in the form of dictionary in python. Thus, PyDPI could calculate the descriptors based on the user-defined property.

```
>>> from pydpi.pypro import PseudoAAC
>>> Hy=PseudoAAC._Hydrophobicity
>>> pk1=PseudoAAC._pK1
>>> rm=PseudoAAC._residuemass
>>> print rm
{'A': 15.0, 'C': 47.0, 'E': 73.0, 'D': 59.0, 'G': 1.0, 'F': 91.0, 'I': 57.0, 'H': 82.0
31.0, 'R': 101.0, 'T': 45.0, 'W': 130.0, 'V': 43.0, 'Y': 107.0}
>>> from pydpi.pypro import PyPro
>>> protein=PyPro()#generate a protein object
>>> protein.ReadProteinSequence(ps)
>>> paacp=protein.GetPAACp(lamda=10,weight=0.05,AAP=[Hy,pk1,rm])
>>> print paacp
{'PAAC29': 4.475, 'PAAC24': 4.285, 'PAAC28': 4.679, 'PAAC25': 4.611, 'PAAC23': 4.518,
4.187, 'PAAC6': 0.31, 'PAAC7': 1.395, 'PAAC4': 1.861, 'PAAC5': 1.551, 'PAAC21': 4.532,
'PAAC19': 2.791, 'PAAC27': 4.66, 'PAAC26': 4.798, 'PAAC14': 3.101, 'PAAC15': 2.636, 'P
'PAAC12': 2.016, 'PAAC13': 1.241}
```

### Example 6: Calculating protein descriptors based on the property from AAindex

A powerful ability of PyDPI is that it can easily calculate thousands of protein features through automatically obtaining the needed property from AAindex.

```
>>> from pydpi.pypro import GetAAIndex1, GetAAIndex23
>>> proindex=GetAAIndex1('KRIW790103',path='.')
>>> print proindex
{'A': 27.5, 'C': 44.6, 'E': 62.0, 'D': 40.0, 'G': 0.0, 'F': 115.5, 'I': 93.5,
: 29.3, 'R': 105.0, 'T': 51.3, 'W': 145.5, 'V': 71.5, 'Y': 117.3}
>>> from pydpi.pypro import PyPro
>>> protein=PyPro()#generate a protein object
>>> protein.ReadProteinSequence(ps)
>>> gearyp=protein.GetGearyAutop(AAP=proindex,AAPName='p')
>>> print len(gearyp)
30
```

## 5. Interaction representation

### 5.1 Protein-protein interaction descriptors

```
>>> from pydpi import pydpi
>>> ppi=pydpi.PyPPI()
>>> ps1=ppi.GetProteinSequenceFromID('P48039') #download protein sequence
>>> ppi.ReadProteinSequence(ps1)
>>> pdict1=ppi.GetPAAC(lamda=10, weight=0.05)
>>> ps2=ppi.GetProteinSequenceFromID('P33765') #download protein sequence
>>> ppi.ReadProteinSequence(ps2)
>>> pdict2=ppi.GetPAAC(lamda=10, weight=0.05)
>>> print ppi.GetPPIFeature1(pdict1,pdict2)
```

### 5.2. Protein-ligand interaction descriptors

```

>>> from pydpi import pydpi
>>> dpi=pydpi.PyDPI() #construct a dpi object
>>> ps=dpi.GetProteinSequenceFromID('P48039') #download a protein sequence from uniprot
>>> dpi.ReadProteinSequence(ps) #read a protein sequence
>>> pdict=dpi.GetAAComp() #calculate amino acid composition descriptors
>>> smi=dpi.GetMolFromNCBI('2244') #download a small molecule from NCBI
>>> print smi
CC(=O)CCCCC(=O)O
>>> dpi.ReadMolFromSmile(smi) #read a molecule
<rdkit.Chem.rdchem.Mol object at 0x3601130>
>>> ddict=dpi.GetKappa() #calculate kappa descriptors
>>> f1=dpi.GetDPIFeature1(ddict,pdict) #calculate protein-ligand interaction features
>>> print f1
{'A': 7.714, 'phi': 2.639096153846154, 'E': 0.571, 'D': 3.429, 'G': 4.286, 'F': 5.714, 'I':
'L': 12.286, 'Q': 2.571, 'P': 4.857, 'S': 7.714, 'R': 5.143, 'kappa1': 11.077, 'T': 2.571, '
9.25, 'kappa3': 2.297, 'kappa2': 3.709, 'W': 2.0}
>>> f2=dpi.GetDPIFeature2(ddict,pdict) #calculate protein-ligand interaction features
>>> print len(f2)
140

```

## Appendix:

**Table S1** List of propy computed features for protein sequences

| Feature group                 | Features                                  | Number of descriptors |
|-------------------------------|-------------------------------------------|-----------------------|
| Amino acid composition        | Amino acid composition                    | 20                    |
|                               | Dipeptide composition                     | 400                   |
|                               | Tripeptide composition                    | 8000                  |
| Autocorrelation               | Normalized Moreau-Broto autocorrelation   | 240 <sup>a</sup>      |
|                               | Moran autocorrelation                     | 240 <sup>a</sup>      |
|                               | Geary autocorrelation                     | 240 <sup>a</sup>      |
| CTD                           | Composition                               | 21                    |
|                               | Transition                                | 21                    |
|                               | Distribution                              | 105                   |
| Conjoint triad                | Conjoint triad features                   | 343                   |
| Quasi-sequence order          | Sequence order coupling number            | 60                    |
|                               | Quasi-sequence order descriptors          | 100                   |
| Pseudo amino acid composition | Pseudo amino acid composition             | 50 <sup>b</sup>       |
|                               | Amphiphilic pseudo amino acid composition | 50 <sup>c</sup>       |

<sup>a</sup> The number depends on the choice of the number of properties of amino acid and the choice of the maximum values of the lag. The default is use eight types of properties and lag = 30.

<sup>b</sup> The number depends on the choice of the number of the set of amino acid properties and the choice of the lamda value. The default is use three types of properties proposed by Chou et al and lamda = 30.

<sup>c</sup> The number depends on the choice of the lamda vlaue. The default is that lamda = 30.

**Table S2** List of PyDPI computed descriptors for small molecules

| <b>Molecular descriptors</b> |                                   |                           |
|------------------------------|-----------------------------------|---------------------------|
|                              | <b>Constitutional descriptors</b> |                           |
| 1 <sup>a</sup>               | Weight                            | Molecular weight          |
| 2                            | nhyd                              | Count of hydrogen atoms   |
| 3                            | nhal                              | Count of halogen atoms    |
| 4 <sup>a</sup>               | nhet                              | Count of hetero atoms     |
| 5 <sup>a</sup>               | nhev                              | Count of heavy atoms      |
| 6                            | ncof                              | Count of F atoms          |
| 7                            | ncoel                             | Count of Cl atoms         |
| 8                            | ncobr                             | Count of Br atoms         |
| 9                            | ncoi                              | Count of I atoms          |
| 10                           | ncarb                             | Count of C atoms          |
| 11                           | nphos                             | Count of P atoms          |
| 12                           | nsulph                            | Count of S atoms          |
| 13                           | noxy                              | Count of O atoms          |
| 14                           | nnitro                            | Count of N atoms          |
| 15 <sup>a</sup>              | nring                             | Number of rings           |
| 16 <sup>a</sup>              | nrot                              | Number of rotatable bonds |
| 17 <sup>a</sup>              | ndonr                             | Number of H-bond donors   |

|                 |                                        |                                     |
|-----------------|----------------------------------------|-------------------------------------|
| 18 <sup>a</sup> | naccr                                  | Number of H-bond acceptors          |
| 19              | nsb                                    | Number of single bonds              |
| 20              | ndb                                    | Number of double bonds              |
| 21              | ntb                                    | Number of triple bonds              |
| 22              | naro                                   | Number of aromatic bonds            |
| 23              | nta                                    | Number of all atoms                 |
| 24              | AWeight                                | Average molecular weight            |
| 25-30           | PC1<br>PC2<br>PC3<br>PC4<br>PC5<br>PC6 | Molecular path counts of length 1-6 |
|                 | <b>Topological descriptors</b>         |                                     |
| 1               | W                                      | Weiner index                        |
| 2               | AW                                     | Average Wiener index                |
| 3 <sup>a</sup>  | J                                      | Balaban's J index                   |
| 4               | T <sub>hara</sub>                      | Harary number                       |
| 5               | T <sub>sch</sub>                       | Schiultz index                      |
| 6               | Tigdi                                  | Graph distance index                |
| 7               | Platt                                  | Platt number                        |
| 8               | Xu                                     | Xu index                            |

|                   |                                                            |                                                                  |
|-------------------|------------------------------------------------------------|------------------------------------------------------------------|
| 9                 | Pol                                                        | Polarity number                                                  |
| 10                | Dz                                                         | Pogliani index                                                   |
| 11 <sup>a</sup>   | Ipc                                                        | Ipc index                                                        |
| 12 <sup>a</sup>   | BertzCT                                                    | BertzCT                                                          |
| 13                | GMTI                                                       | Gutman molecular topological index based on simple vertex degree |
| 14-15             | ZM1<br>ZM2                                                 | Zagreb index with order 1-2                                      |
| 16-17             | MZM1<br>MZM2                                               | Modified Zagreb index with order 1-2                             |
| 18                | Qindex                                                     | Quadratic index                                                  |
| 19                | diametert                                                  | Largest value in the distance matrix                             |
| 20                | radiust                                                    | radius based on topology                                         |
| 21                | petitjeant                                                 | Petitjean based on topology                                      |
| 22                | Sito                                                       | the logarithm of the simple topological index by Narumi          |
| 23                | Hato                                                       | harmonic topological index proposed by Narumi                    |
| 24                | Geto                                                       | Geometric topological index by Narumi                            |
| 25                | Arto                                                       | Arithmetic topological index by Narumi                           |
|                   |                                                            |                                                                  |
|                   | <b>Connectivity descriptors</b>                            |                                                                  |
| 1-11 <sup>a</sup> | $\chi^v$<br>${}^1\chi^v$<br>${}^2\chi^v$<br>${}^3\chi_p^v$ | Valence molecular connectivity Chi index for path order 0-10     |

|                    |                                                                                                                                                                           |                                                               |
|--------------------|---------------------------------------------------------------------------------------------------------------------------------------------------------------------------|---------------------------------------------------------------|
|                    | ${}^4\chi_p^v$<br>${}^5\chi_p^v$<br>${}^6\chi_p^v$<br>${}^7\chi_p^v$<br>${}^8\chi_p^v$<br>${}^9\chi_p^v$<br>${}^{10}\chi_p^v$                                             |                                                               |
| 12                 | ${}^3\chi_c^v$                                                                                                                                                            | Valence molecular connectivity Chi index for three cluster    |
| 13                 | ${}^4\chi_c^v$                                                                                                                                                            | Valence molecular connectivity Chi index for four cluster     |
| 14                 | ${}^4\chi_{pc}^v$                                                                                                                                                         | Valence molecular connectivity Chi index for path/cluster     |
| 15-18              | ${}^3\chi_{CH}^v$<br>${}^4\chi_{CH}^v$<br>${}^5\chi_{CH}^v$<br>${}^6\chi_{CH}^v$                                                                                          | Valence molecular connectivity Chi index for cycles of 3-6    |
| 19-29 <sup>a</sup> | ${}^0\chi$<br>${}^1\chi$<br>${}^2\chi$<br>${}^3\chi_p$<br>${}^4\chi_p$<br>${}^5\chi_p$<br>${}^6\chi_p$<br>${}^7\chi_p$<br>${}^8\chi_p$<br>${}^9\chi_p$<br>${}^{10}\chi_p$ | Simple molecular connectivity Chi indices for path order 0-10 |
| 30                 | ${}^3\chi_c$                                                                                                                                                              | Simple molecular connectivity Chi indices for three cluster   |
| 31                 | ${}^4\chi_c$                                                                                                                                                              | Simple molecular connectivity Chi indices for four cluster    |
| 32                 | ${}^4\chi_{pc}$                                                                                                                                                           | Simple molecular connectivity Chi indices for path/cluster    |

|                |                                                                  |                                                             |
|----------------|------------------------------------------------------------------|-------------------------------------------------------------|
| 33-36          | $^3\chi_{CH}$<br>$^4\chi_{CH}$<br>$^5\chi_{CH}$<br>$^6\chi_{CH}$ | Simple molecular connectivity Chi indices for cycles of 3-6 |
| 37             | mChi1                                                            | mean chi1 (Randic) connectivity index                       |
| 38             | knotp                                                            | the difference between chi3c and chi4pc                     |
| 39             | dchi0                                                            | the difference between chi0v and chi0                       |
| 40             | dchi1                                                            | the difference between chi1v and chi1                       |
| 41             | dchi2                                                            | the difference between chi2v and chi2                       |
| 42             | dchi3                                                            | the difference between chi3v and chi3                       |
| 43             | dchi4                                                            | the difference between chi4v and chi4                       |
| 44             | knotpv                                                           | the difference between chiv3c and chiv4pc                   |
|                | <b>Kappa descriptors</b>                                         |                                                             |
| 1              | $^1\kappa_\alpha$                                                | Kappa alpha index for 1 bonded fragment                     |
| 2              | $^2\kappa_\alpha$                                                | Kappa alpha index for 2 bonded fragment                     |
| 3              | $^3\kappa_\alpha$                                                | Kappa alpha index for 3 bonded fragment                     |
| 4              | phi                                                              | Kier molecular flexibility index                            |
| 5 <sup>a</sup> | $^1\kappa$                                                       | Molecular shape Kappa index for 1 bonded fragment           |
| 6 <sup>a</sup> | $^2\kappa$                                                       | Molecular shape Kappa index for 2 bonded fragment           |
| 7 <sup>a</sup> | $^3\kappa$                                                       | Molecular shape Kappa index for 3 bonded fragment           |
|                | <b>Burden Descriptors</b>                                        |                                                             |

|                                      |           |                                                                  |
|--------------------------------------|-----------|------------------------------------------------------------------|
| 1-16                                 | bcutm1-16 | Burden descriptors based on atomic mass                          |
| 17-32                                | bcutv1-16 | Burden descriptors based on atomic volumes                       |
| 33-48                                | bcute1-16 | Burden descriptors based on atomic electronegativity             |
| 49-64                                | bcutp1-16 | Burden descriptors based on polarizability                       |
| <b>Basak information descriptors</b> |           |                                                                  |
| 1                                    | IC0       | Information content with order 0 proposed by Basak               |
| 2                                    | IC1       | Information content with order 1 proposed by Basak               |
| 3                                    | IC2       | Information content with order 2 proposed by Basak               |
| 4                                    | IC3       | Information content with order 3 proposed by Basak               |
| 5                                    | IC4       | Information content with order 4 proposed by Basak               |
| 6                                    | IC5       | Information content with order 5 proposed by Basak               |
| 7                                    | IC6       | Information content with order 6 proposed by Basak               |
| 8                                    | SIC0      | Complementary information content with order 0 proposed by Basak |
| 9                                    | SIC1      | Structural information content with order 1 proposed by Basak    |
| 10                                   | SIC2      | Structural information content with order 2 proposed by Basak    |
| 11                                   | SIC3      | Structural information content with order 3 proposed by Basak    |
| 12                                   | SIC4      | Structural information content with order 4 proposed by Basak    |
| 13                                   | SIC5      | Structural information content with order 5 proposed by Basak    |
| 14                                   | SIC6      | Structural information content with order 6 proposed by Basak    |
| 15                                   | CIC0      | Complementary information content with order 0                   |

|    |                            |                                                                  |
|----|----------------------------|------------------------------------------------------------------|
|    |                            | proposed by Basak                                                |
| 16 | CIC1                       | Complementary information content with order 1 proposed by Basak |
| 17 | CIC2                       | Complementary information content with order 2 proposed by Basak |
| 18 | CIC3                       | Complementary information content with order 3 proposed by Basak |
| 19 | CIC4                       | Complementary information content with order 4 proposed by Basak |
| 20 | CIC5                       | Complementary information content with order 5 proposed by Basak |
| 21 | CIC6                       | Complementary information content with order 6 proposed by Basak |
|    | <b>E-state descriptors</b> |                                                                  |
| 1  | S(1)                       | Sum of E-State of atom type: sLi                                 |
| 2  | S(2)                       | Sum of E-State of atom type: ssBe                                |
| 3  | S(3)                       | Sum of E-State of atom type: ssssBe                              |
| 4  | S(4)                       | Sum of E-State of atom type: ssBH                                |
| 5  | S(5)                       | Sum of E-State of atom type: sssB                                |
| 6  | S(6)                       | Sum of E-State of atom type: ssssB                               |
| 7  | S(7)                       | Sum of E-State of atom type: sCH3                                |
| 8  | S(8)                       | Sum of E-State of atom type: dCH2                                |
| 9  | S(9)                       | Sum of E-State of atom type: ssCH2                               |
| 10 | S(10)                      | Sum of E-State of atom type: tCH                                 |
| 11 | S(11)                      | Sum of E-State of atom type: dsCH                                |
| 12 | S(12)                      | Sum of E-State of atom type: aaCH                                |

|    |       |                                    |
|----|-------|------------------------------------|
| 13 | S(13) | Sum of E-State of atom type: sssCH |
| 14 | S(14) | Sum of E-State of atom type: ddC   |
| 15 | S(15) | Sum of E-State of atom type: tsC   |
| 16 | S(16) | Sum of E-State of atom type: dssC  |
| 17 | S(17) | Sum of E-State of atom type: aasC  |
| 18 | S(18) | Sum of E-State of atom type: aaaC  |
| 19 | S(19) | Sum of E-State of atom type: ssssC |
| 20 | S(20) | Sum of E-State of atom type: sNH3  |
| 21 | S(21) | Sum of E-State of atom type: sNH2  |
| 22 | S(22) | Sum of E-State of atom type: ssNH2 |
| 23 | S(23) | Sum of E-State of atom type: dNH   |
| 24 | S(24) | Sum of E-State of atom type: ssNH  |
| 25 | S(25) | Sum of E-State of atom type: aaNH  |
| 26 | S(26) | Sum of E-State of atom type: tN    |
| 27 | S(27) | Sum of E-State of atom type: sssNH |
| 28 | S(28) | Sum of E-State of atom type: dsN   |
| 29 | S(29) | Sum of E-State of atom type: aaN   |
| 30 | S(30) | Sum of E-State of atom type: sssN  |
| 31 | S(31) | Sum of E-State of atom type: ddsN  |
| 32 | S(32) | Sum of E-State of atom type: aasN  |

|    |       |                                     |
|----|-------|-------------------------------------|
| 33 | S(33) | Sum of E-State of atom type: ssssN  |
| 34 | S(34) | Sum of E-State of atom type: sOH    |
| 35 | S(35) | Sum of E-State of atom type: dO     |
| 36 | S(36) | Sum of E-State of atom type: ssO    |
| 37 | S(37) | Sum of E-State of atom type: aaO    |
| 38 | S(38) | Sum of E-State of atom type: sF     |
| 39 | S(39) | Sum of E-State of atom type: sSiH3  |
| 40 | S(40) | Sum of E-State of atom type: ssSiH2 |
| 41 | S(41) | Sum of E-State of atom type: sssSiH |
| 42 | S(42) | Sum of E-State of atom type: ssssSi |
| 43 | S(43) | Sum of E-State of atom type: sPH2   |
| 44 | S(44) | Sum of E-State of atom type: ssPH   |
| 45 | S(45) | Sum of E-State of atom type: sssP   |
| 46 | S(46) | Sum of E-State of atom type: dsssP  |
| 47 | S(47) | Sum of E-State of atom type: sssssP |
| 48 | S(48) | Sum of E-State of atom type: sSH    |
| 49 | S(49) | Sum of E-State of atom type: dS     |
| 50 | S(50) | Sum of E-State of atom type: ssS    |
| 51 | S(51) | Sum of E-State of atom type: aaS    |
| 52 | S(52) | Sum of E-State of atom type: dssS   |

|    |       |                                      |
|----|-------|--------------------------------------|
| 53 | S(53) | Sum of E-State of atom type: ddssS   |
| 54 | S(54) | Sum of E-State of atom type: sCl     |
| 55 | S(55) | Sum of E-State of atom type: sGeH3   |
| 56 | S(56) | Sum of E-State of atom type: ssGeH2  |
| 57 | S(57) | Sum of E-State of atom type: sssGeH  |
| 58 | S(58) | Sum of E-State of atom type: sssGe   |
| 59 | S(59) | Sum of E-State of atom type: sAsH2   |
| 60 | S(60) | Sum of E-State of atom type: ssAsH   |
| 61 | S(61) | Sum of E-State of atom type: sssAs   |
| 62 | S(62) | Sum of E-State of atom type: sssdAs  |
| 63 | S(63) | Sum of E-State of atom type: sssssAs |
| 64 | S(64) | Sum of E-State of atom type: sSeH    |
| 65 | S(65) | Sum of E-State of atom type: dSe     |
| 66 | S(66) | Sum of E-State of atom type: ssSe    |
| 67 | S(67) | Sum of E-State of atom type: aaSe    |
| 68 | S(68) | Sum of E-State of atom type: dssSe   |
| 69 | S(69) | Sum of E-State of atom type: ddssSe  |
| 70 | S(70) | Sum of E-State of atom type: sBr     |
| 71 | S(71) | Sum of E-State of atom type: sSnH3   |
| 72 | S(72) | Sum of E-State of atom type: ssSnH2  |

|         |                                    |                                                                                      |
|---------|------------------------------------|--------------------------------------------------------------------------------------|
| 73      | S(73)                              | Sum of E-State of atom type: sssSnH                                                  |
| 74      | S(74)                              | Sum of E-State of atom type: ssssSn                                                  |
| 75      | S(75)                              | Sum of E-State of atom type: sI                                                      |
| 76      | S(76)                              | Sum of E-State of atom type: sPbH3                                                   |
| 77      | S(77)                              | Sum of E-State of atom type: ssPbH2                                                  |
| 78      | S(78)                              | Sum of E-State of atom type: sssPbH                                                  |
| 79      | S(79)                              | Sum of E-State of atom type: ssssPb                                                  |
| 80-158  | Smax1-Smax79                       | maximum of E-State value of specified atom type                                      |
| 159-237 | Smin1-Smin79                       | minimum of E-State value of specified atom type                                      |
|         | <b>Autocorrelation descriptors</b> |                                                                                      |
| 1-8     | ATSm1-ATSm8                        | Moreau-Broto autocorrelation descriptors based on atom mass                          |
| 9-16    | ATSv1-ATSv8                        | Moreau-Broto autocorrelation descriptors based on atomic van der Waals volume        |
| 17-24   | ATSe1-ATSe8                        | Moreau-Broto autocorrelation descriptors based on atomic Sanderson electronegativity |
| 25-32   | ATSp1-ATSp8                        | Moreau-Broto autocorrelation descriptors based on atomic polarizability              |
| 33-40   | MATSm1-MATSm8                      | Moran autocorrelation descriptors based on atom mass                                 |
| 41-48   | MATSV1-MATSV8                      | Moran autocorrelation descriptors based on atomic van der Waals volume               |
| 49-56   | MATSe1-MATSe8                      | Moran autocorrelation descriptors based on atomic Sanderson electronegativity        |
| 57-64   | MATSp1-MATSp8                      | Moran autocorrelation descriptors based on atomic polarizability                     |

|                           |                                                               |                                                                               |
|---------------------------|---------------------------------------------------------------|-------------------------------------------------------------------------------|
| 65-72                     | GATSm1-GATSm8                                                 | Geary autocorrelation descriptors based on atom mass                          |
| 73-80                     | GATSV1-GATSV8                                                 | Geary autocorrelation descriptors based on atomic van der Waals volume        |
| 81-88                     | GATSe1-GATSe8                                                 | Geary autocorrelation descriptors based on atomic Sanderson electronegativity |
| 89-96                     | GATSp1-GATSp8                                                 | Geary autocorrelation descriptors based on atomic polarizability              |
| <b>Charge descriptors</b> |                                                               |                                                                               |
| 1-4                       | $Q_{Hmax}$<br>$Q_{Cmax}$<br>$Q_{Nmax}$<br>$Q_{Omax}$          | Most positive charge on H,C,N,O atoms                                         |
| 5-8                       | $Q_{Hmin}$<br>$Q_{Cmin}$<br>$Q_{Nmin}$<br>$Q_{Omin}$          | Most negative charge on H,C,N,O atoms                                         |
| 9-10                      | $Q_{max}$<br>$Q_{min}$                                        | Most positive and negative charge in a molecule                               |
| 11-15                     | $Q_{HSS}$<br>$Q_{CSS}$<br>$Q_{NSS}$<br>$Q_{OSS}$<br>$Q_{ass}$ | Sum of squares of charges on H,C,N,O and all toms                             |
| 16-17                     | $M_{pc}$<br>$T_{pc}$                                          | Mean and total of positive charges                                            |
| 18-19                     | $M_{nc}$<br>$T_{nc}$                                          | Mean and total of negative charges                                            |
| 20-21                     | $M_{ac}$<br>$T_{ac}$                                          | Mean and total of absolute charges                                            |
| 22                        | $R_{pc}$                                                      | Relative positive charge                                                      |

|                    |                                       |                                                                               |
|--------------------|---------------------------------------|-------------------------------------------------------------------------------|
| 23                 | Rnc                                   | Relative negative charge                                                      |
| 24                 | SPP                                   | Submolecular polarity parameter                                               |
| 25                 | LDI                                   | Local dipole index                                                            |
|                    | <b>Molecular property descriptors</b> |                                                                               |
| 1 <sup>a</sup>     | MREF                                  | Molar refractivity                                                            |
| 2 <sup>a</sup>     | logP                                  | LogP value based on the Crippen method                                        |
| 3                  | logP2                                 | Square of LogP value based on the Crippen method                              |
| 4 <sup>a</sup>     | TPSA                                  | Topological polarity surface area                                             |
| 5                  | UI                                    | Unsaturation index                                                            |
| 6                  | Hy                                    | Hydrophilic index                                                             |
|                    | <b>MOE-type descriptors</b>           |                                                                               |
| 1 <sup>a</sup>     | MTPSA                                 | topological polar surface area based on fragments                             |
| 2 <sup>a</sup>     | LabuteASA                             | Labute's Approximate Surface Area                                             |
| 3-14 <sup>a</sup>  | SLOGPVSA                              | MOE-type descriptors using SLogP contributions and surface area contributions |
| 15-24 <sup>a</sup> | SMRVSA                                | MOE-type descriptors using MR contributions and surface area contributions    |
| 25-38 <sup>a</sup> | PEOEVSA                               | MOE-type descriptors using partial charges and surface area contributions     |
| 39-49 <sup>a</sup> | EstateVSA                             | MOE-type descriptors using Estate indices and surface area contributions      |
| 50-60 <sup>a</sup> | VSAEstate                             | MOE-type descriptors using surface area contributions and Estate indices      |

|                | <b>Fragment/Fingerprint-based descriptors</b> |                                                                                            |
|----------------|-----------------------------------------------|--------------------------------------------------------------------------------------------|
| 1 <sup>a</sup> | FP2                                           | (Topological fingerprint) A Daylight-like fingerprint based on hashing molecular subgraphs |
| 2 <sup>a</sup> | MACCS                                         | (MACCS keys) Using the 166 public keys implemented as SMARTS                               |
| 3              | E-state                                       | 79 E-state fingerprints or fragments                                                       |
| 4              | FP4                                           | 307 FP4 fingerprints                                                                       |
| 5 <sup>a</sup> | Atom Paris                                    | Atom Paris fingerprints                                                                    |
| 6 <sup>a</sup> | Torsions                                      | Topological torsion fingerprints                                                           |
| 7 <sup>a</sup> | Morgan/Circular                               | Fingerprints based on the Morgan algorithm                                                 |

Note: <sup>a</sup> indicates that these descriptors are from RDkit. In PyDPI, we wrapped most of molecular descriptors from RDkit. The other descriptors are independently coded by us.
